# Supplementary material for: The western Mediterranean region provided the founder population of domesticated narrow-leafed lupin
Source: PubMed Central journal article supplement (PMC6244526; doi:10.1007/s00122-018-3171-x), 2018-09-17

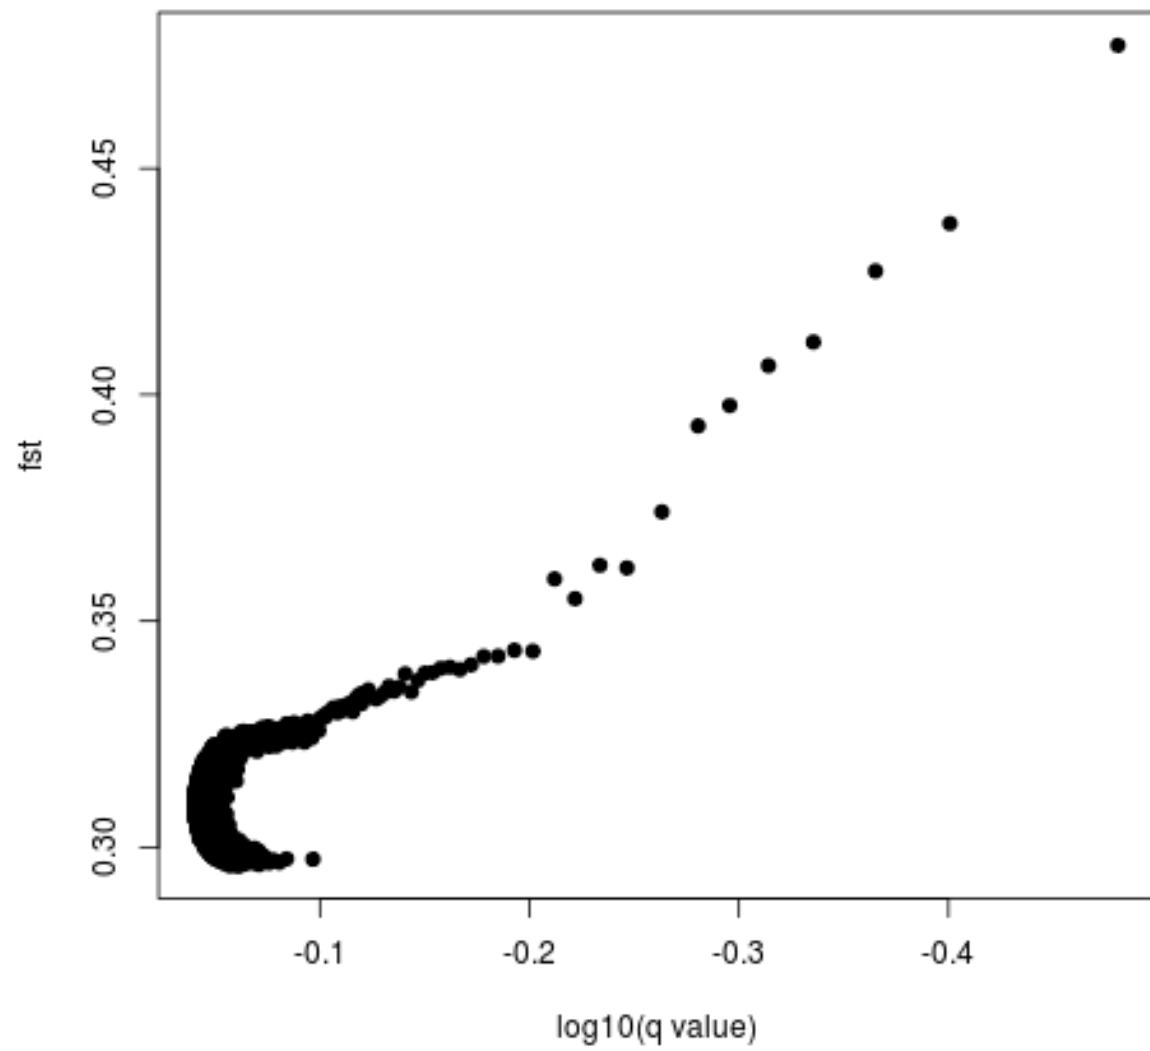

Supplement: 122_2018_3171_MOESM7_ESM.pdf [file 122_2018_3171_MOESM7_ESM.pdf]
